## Healthcare workers' high COVID-19 infection rate: the source of infections and potential for respirators and surgical masks to reduce occupational infections

Lotta-Maria A. H. Oksanen, *doctoral student*<sup>ab</sup>, Enni Sanmark, *postdoctoral fellow*<sup>ab</sup>, Sampo A. Oksanen, *consultant, statistician*<sup>c</sup>, Veli-Jukka Anttila, *associate professor*<sup>ad</sup>, Jussi J. Paterno, *M.D., statistician*<sup>e</sup>, Maija Lappalainen, *associate professor*<sup>af</sup>, Lasse Lehtonen, *professor*<sup>af</sup>, Ahmed Geneid, *associate professor*<sup>ab</sup>

<sup>a</sup> University of Helsinki, Finland

<sup>b</sup> HUS Department of Otorhinolaryngology and Phoniatics – Head and Neck Surgery , Helsinki University Hospital, Finland

<sup>c</sup> Nordic Healthcare Group, Finland

<sup>d</sup> HUS Inflammation Center, Helsinki University Hospital, Finland

<sup>e</sup> Department of Ophthalmology, Kuopio University Hospital; University of Eastern Finland, Finland

<sup>f</sup> HUS Diagnostic Center, HUSLAB, Helsinki University Hospital, Finland

Corresponding author:

Lotta-Maria Adele Helena Oksanen

HUS Head and Neck Center, Department of Otorhinolaryngology and Phoniatics

Maistraatinportti 2, POB 250, 00029

[lotta.oksanen@hus.fi](mailto:lotta.oksanen@hus.fi)

*All authors have completed the [Unified Competing Interest form](#) (available on request from the corresponding author) and declare: no support from any organisation for the submitted work; no financial relationships with any organisations that might have an interest in the submitted work in the previous three years, no other relationships or activities that could appear to have influenced the submitted work."*

*The lead author Lotta-Maria Oksanen affirms that the manuscript is an honest, accurate, and transparent account of the study being reported; that no important aspects of the study have been omitted; and that any discrepancies from the study as planned (and, if relevant, registered) have been explained.*

*The corresponding author attests that all listed authors meet authorship criteria and that no others meeting the criteria have been omitted.*

*Data sharing: No additional data is available at this point.*

*We plan to disseminate the results of this article to study participants after publication.*

Word count: 3322

**NOTE: This preprint reports new research that has not been certified by peer review and should not be used to guide clinical practice.**

## ABSTRACT

**Objective:** To analyse the work-related exposure to SARS-CoV-2 and trace the source of COVID-19 infections in tertiary hospitals' healthcare workers in light of the used PPE and their ability to maintain social distances and follow governmental restrictions.

**Design:** Cross-sectional study

**Setting:** Tertiary hospitals in Uusimaa region, Finland

**Participants:** Of 1072 enrolled, 866 HCWs (588 nurses, 170 doctors and 108 laboratory and medical imaging nurses) from the Helsinki University Hospital completed the questionnaire by July 15<sup>th</sup>, 2020. The average age of participants was 42.4 years and 772 (89.0%) were women. The participants answered a detailed questionnaire of their PPE usage, ability to follow safety restrictions, exposure to COVID-19, the source of potential COVID-19 infection and both mental and physical symptoms during the first wave of COVID-19 in Finland.

**Main outcome measures:** All participants with COVID-19 symptoms were tested with either RT-PCR or antibody tests. The infections were traced and categorised based on the location and source of infection. The possibility to maintain social distance and PPE usage during exposure were analyzed.

**Results:** Of the HCWs that participated, 41 (4.7%) tested positive for SARS-CoV-2, marking a substantially higher infection rate than that of the general population (0.3%); 22 (53.6%) of infections were confirmed or likely occupational, including 7 (31.8%) from colleagues. Additionally, 5 (26.3%) of other infections were from colleagues outside the working facilities. 14 (63.6%) of occupational infections occurred while using a surgical mask. No occupational infections were found while using an FFP2/3 respirator and aerosol precautions while treating suspected or confirmed COVID-19 patients.

**Conclusions:** While treating suspected or confirmed COVID-19 patients, HCWs should wear an FFP2/3 respirator and recommended PPE. Maintaining safety distances in the workplace and controlling infections between HCWs should be priorities to ensure safe working conditions.

**Abbreviations:** coronavirus disease 2019 (COVID-19), personal protective equipment (PPE), aerosol-generating procedure (AGP)

**Keywords:** COVID-19, occupational infections, personal protective equipment, surgical mask, FFP2, FFP3, respirator, #properPPE

## INTRODUCTION

SARS-CoV-2 spreads mainly via droplets, secretions and direct contact<sup>1</sup>. Lately, the possibility of airborne transmission has been discussed even in the absence of aerosol-generating procedures (AGP), especially indoors<sup>2 3</sup>. SARS-CoV-2 appears to be more infectious than influenza, and the reproductive number (RO) has been estimated to be as high as 2.3-5.7 in the general population in various studies<sup>1 4-6</sup>. The infection rates of healthcare workers (HCW) varies widely from country to country, ranging from 2.2% to 44% yet exceeding that of the general population<sup>7 8</sup>.

### The first wave and restrictions in Finland

The COVID-19 infection reached the epidemic threshold in mid-March, and the Finnish government declared a state of emergency from March 16<sup>th</sup> to June 16<sup>th</sup> 2020. The primary focus was on social distancing with restrictions for travel, limitations of no more than 10 persons for public gatherings, and recommendations to avoid spending time in public places. Additionally, visitors were banned from care institutions, healthcare units, and hospitals. Also, the epicenter of the COVID-19 epidemic in Finland, the Uusimaa region, was isolated

from the rest of the Finland between March 28<sup>th</sup> and April 15<sup>th</sup>. Helsinki University Hospital (HUS) is responsible for that region's specialised care, and its healthcare professionals are the focus of this article. By July 15<sup>th</sup>, Finland had 7 293 confirmed cases of COVID-19, 5223 of which were in the HUS region, with a 0.3% infection rate.<sup>9</sup> In the HUS region, 794 (15.2%) workers in social and healthcare organizations were infected with COVID-19 by July 15<sup>th</sup> 2020; 349 (44.0%) had occupational infection, 207 (26.1%) infections were non-occupational, and for 238 (30.0%) the source was unclear; 153 were HCWs (19.3%) working at HUS.<sup>10-12</sup>

### **Restrictions at HUS**

Due to the crisis, HUS instructed personnel with several restrictions to avoid spreading the virus in the hospital facilities; non-urgent patient contact was postponed, and personnel were instructed to 1) avoid all trips abroad, 2) avoid all gatherings and favour digital meetings and remote patient contact, 3) keep at least one meter of distance from other employees, 4) maintain good hand hygiene, 5) use the required personal protective equipment (PPE), and 6) self-isolate and get tested for COVID-19 (nasopharyngeal or oropharyngeal RT-PCR) if they experience any COVID-19-related symptoms.

### **The debate over masks and respirators in COVID-19 infections**

As the transmission routes of SARS-CoV-2 are still partly debated, there has been speculation about which PPE (especially masks and respirators) HCWs should use with various patient groups and during medical procedures. The World Health Organization (WHO) has aligned that HCWs working with COVID-19 patients should use masks throughout their shift and N95 or FFP2/FFP3 respirators during potential AGPs as well as in semi-intensive and intensive care units (ICU)<sup>13</sup>. During the first wave, HUS generally followed the WHO's recommendations regarding PPE instructions for the ICU, but no masks were used in the staff area. Cohorted wards had similar recommendations for PPE at first but were quickly reduced to surgical

mask instead of an FFP3 respirator; on March 26<sup>th</sup> the instruction was loosened further as gowns were only required during close patient contact, and hair protection was no longer required. Cohorted wards followed droplet precautions whereas ICUs also followed aerosol precautions while doffing.

Differences between surgical masks and respirators like N95 and FFP2/3 have been studied during the recent decade concerning different respiratory viruses and bacteria but not with COVID-19. A meta-analysis and systematic review by Smith et al. shows that N95 respirators have a protective advantage over surgical masks in laboratory conditions but do not protect HCWs better against influenza in clinical work<sup>14</sup>. Other studies have not shown any difference in morbidity from influenza in HCWs using either an N95 respirator or a surgical mask<sup>15</sup>.

However, in bacterial infections, N95 respirators have been observed to prevent infection better than surgical masks<sup>15</sup>. These previous studies did not observe the possibility of non-occupational infection and used no other restrictions to reduce the non-work or colleague-related exposure.

### **Purpose of the study**

The purpose of this study was to analyze the work-related exposure to SARS-CoV-2 and trace the source of COVID-19 infections in tertiary hospitals' HCWs in light of the used PPE and their ability to maintain social distances and follow governmental restrictions. The hypothesis was that usage of FFP2/3 masks prevents workplace related COVID-19 infections.

### **MATERIAL AND METHODS**

Out of 17 740 nurses, midwives, and doctors working at Helsinki University Hospital, 1072 (6.0%) enrolled to the study, and 866 (4.9%) answered the questionnaire completely between June 12<sup>th</sup> and July 15<sup>th</sup>, 2020. The minimum study size of 366 was calculated by

statistical power calculation. The inclusion criteria were 18 years of age or older; education as a practical nurse, paramedic, nurse, laboratorian, radiological nurse, midwife, or doctor; and employment at HUS between March and July, 2020. Participants filled out a detailed questionnaire with 150 questions about their common health risks (smoking, alcohol consumption, body mass index, diseases, and medications as well as risk factors for COVID-19), leisure and working conditions during the COVID-19 pandemic (including PPE, potential infection symptoms, and exposure to COVID-19), and other topics about COVID-19 and mental health. Participants' medical history was reviewed in July 2020 for COVID-19 RT-PCR and antibody results. In Finland, all HCWs including the participants of this study who presented any COVID-19-related symptoms have been tested according to the instructions of the Finnish Institute for Health and Welfare (THL) with the standard HUSLAB RT-PCR methods<sup>16 17</sup>. Additionally, some HUS workers have been tested with antibodies as part of the employer's COVID-19 strategy, and all who tested positive with the first antibody test were tested for neutralising antibodies to confirm the diagnostics<sup>18</sup>. Potential AGPs were listed according to the THL as intubation, extubation, resuscitation, direct laryngoscopy, bronchoscopy, upper gastrointestinal endoscopy, non-invasive ventilation, use of nebulizer, high-flow nasal oxygen, open suction of the mucus from airways, and oral and ENT surgery<sup>19</sup>.

The number of COVID-19 infections in HCWs was calculated and compared to the general population in the same area. The infection rate was calculated for all HCWs and each occupation separately. PPE usage was compared between infected and non-infected HCWs. All infected participants were contacted, and their answers were confirmed regarding the tracing of infection, the usage of PPE at the time of the assumed transmission, and the ability to maintain social distance at that time. The original tracing was done after the initial

diagnosis by a local tracing team led by an infection doctor. The infection was categorised as occupational if there were clear infection contacts (ICs) in the workplace and no possible IC outside the workplace; infection was likely occupational if there were clear ICs in the workplace and some non-COVID-19-related contacts outside the workplace. Not all infections were traced successfully, so they were marked “unclear”.

### **Statistical analysis**

The statistical analysis was performed using statistical software (IBM SPSS Statistics 25, Chicago, USA). Differences between nominal variables were tested using a chi-square test or Fischer’s exact test with a  $P < 0.05$  significance level. Odds ratios (ORs) and a 95% confidence interval (CI) were calculated using logistic regression with variance calculation. Some of the participants didn’t answer to all questions, leading to varying sample size from question to question. The number of answers per question is presented accordingly.

### **Patient and public involvement**

Due to the exceptional situation during the COVID-19 pandemic, no patients or public were directly involved in the development, implementation, or interpretation of this study. Our study design was established on questionnaires, RT-PCR, and antibody testing, that were aimed at HUS’ HCWs and required strong identification for enrolment.

### **Ethical considerations**

All procedures that involved human participants were conducted in accordance with the ethical standards of the institutional or national research committee and the 1964 Declaration of Helsinki and its later amendments or comparable ethical standards. The Ethics Committee of Helsinki University Hospital approved the study protocol (HUS/1760/2016). All responders provided written informed consent prior to their participation.

## RESULTS

### Characteristics, infection rates, and exposure among studied HUS personnel

Of the 866 HCWs who participated in the study, 820 (94.7%) said that they had followed all the restrictions imposed by the Finnish government. Characteristics of the participants are presented in Table 1.

**Table 1.** Characteristics of survey participants divided into four groups (all, no COVID-19 infection, COVID-19 infected, likely occupational COVID-19 infection) compared to personnel from HUS.\* Infection status by July 15<sup>th</sup>, 2020 or by the time of survey completion (June 12<sup>th</sup>– July 15<sup>th</sup>, 2020)

| Characteristics                                | Survey participants      |                               |                           |                                                            | HUS                                       |
|------------------------------------------------|--------------------------|-------------------------------|---------------------------|------------------------------------------------------------|-------------------------------------------|
|                                                | All participants (N=866) | No COVID-19 infection (N=825) | COVID-19 infection (N=41) | Likely or confirmed occupational COVID-19 infection (N=22) | Nurses and doctors in 2019 (N=17 740) *** |
| <b>Personnel – no. (%)</b>                     |                          |                               |                           |                                                            |                                           |
| Nurses                                         | 588 (67.9)               | 553 (67.0)                    | 35 (85.4)                 | 20 (90.9)                                                  | 12 008 (67.7)                             |
| Doctors                                        | 170 (19.6)               | 164 (19.9)                    | 6 (14.6)                  | 2 (9.1)                                                    | 3 430 (19.3)                              |
| Laboratory & medical imaging nurses            | 108 (12.5)               | 108 (13.1)                    | 0 (0)                     | 0 (0)                                                      | 2 302 (13.0)                              |
| <b>Age – yr</b>                                | 42.4 ±11.0               | 42.2 ±11.0                    | 45.6 ±10.9                | 41.5 ±9.8                                                  | 43.8****                                  |
| <b>Sex – no. (%)</b>                           |                          |                               |                           |                                                            |                                           |
| Female                                         | 772 (89.0)               | 734 (89.0)                    | 38 (92.7)                 | 19 (86.4)                                                  | (83.9)****                                |
| Male                                           | 94 (10.9)                | 91 (11.0)                     | 3 (7.3)                   | 3 (13.6)                                                   | (16.1)****                                |
| <b>Existing risk factors – no. (%)**</b>       |                          |                               |                           |                                                            | Not available                             |
| Severe heart disease                           | 2 (0.2)                  | 2 (0.2)                       | 0 (0)                     | 0 (0)                                                      |                                           |
| Lung disease that is not clinically stabilised | 22 (2.5)                 | 20 (2.4)                      | 2 (5.0)                   | 1 (2.6)                                                    |                                           |
| Diabetes that involves organ damage            | 1 (0.1)                  | 1 (0.1)                       | 0 (0)                     | 0 (0)                                                      |                                           |
| Diseases that weaken the immune system         | 8 (0.9)                  | 8 (1.0)                       | 0 (0)                     | 0 (0)                                                      |                                           |
| Medication that significantly                  | 12 (1.4)                 | 12 (1.5)                      | 0 (0)                     | 0 (0)                                                      |                                           |



|                                               |            |            |           |           |               |
|-----------------------------------------------|------------|------------|-----------|-----------|---------------|
| weakens the immune system                     |            |            |           |           |               |
| None of the above                             | 813 (94.8) | 780 (94.8) | 38 (95.0) | 20 (90.9) |               |
| <b>Other potential risk factors – no. (%)</b> |            |            |           |           | Not available |
| Daily smoking                                 | 80 (9.2)   | 76 (9.2)   | 4 (9.8)   | 2 (9.1)   |               |
| Morbid obesity (+40 BMI)                      | 20 (2.3)   | 18 (2.2)   | 2 (4.9)   | 2 (9.1)   |               |

\*Plus-minus values are means  $\pm$ SD. Percentages may not total 100 because of rounding. Not all participants answered all questions.

\*\*Corona risk factors based on the recommendations of the Finnish Institute for Health and Welfare. None of the participants had the risk factors “over 70 years old” or “chronic liver or kidney disease” and thus those are not shown here

\*\*\* Information about HUS personnel<sup>20</sup>

\*\*\*\*all personnel

During the first wave, 431 (52.8%) participants took care of at least some COVID-19 patients.

Out of 21 pregnant participants, 10 (47.6%) knowingly took care of COVID-19 patients, and 3

(14.3%) were uncertain. Among the group, 47 (5.4%) HCWs said they had tested positive for

COVID-19 either by RT-PCR or antibody test, but 6 (12.8%) were later found to be false

positive as they only had a positive first antibody test and a negative neutralization test; this

resulted in 41 (4.7%) true positive infections, representing 26.8% of infected HCWs at HUS.

Of those who tested positive, 26 (63.4%) COVID-19-positive participants informed that they

knowingly took care of COVID-19 patients.

The infection rates of COVID-19-positive participants are shown by location and source in

Table 2.

**Table 2.** COVID-19 infection rate of participants (N=866) by location of infection, and location of infection by source

| Infection location of positive participants                    | Confirmed workplace (N=13) | Likely workplace (N=9) | Unclear (N=4) | Outside workplace (N=15) |
|----------------------------------------------------------------|----------------------------|------------------------|---------------|--------------------------|
| <b>Infection rate by infection location, % of participants</b> | 1.5                        | 1.0                    | 0.5           | 1.7                      |
| <b>Source of infection – no. (%)</b>                           |                            |                        |               |                          |
| Colleague                                                      | 5 (38.5)                   | 0 (0.0)                | 0 (0.0)       | 5 (33.3)                 |
| Likely colleague                                               | 0 (0.0)                    | 2 (22.2)               | 0 (0.0)       | 0 (0.0)                  |
| Business trip                                                  | 0 (0.0)                    | 0 (0.0)                | 0 (0.0)       | 2 (13.3)                 |
| Patient                                                        | 3 (23.1)                   | 0 (0.0)                | 0 (0.0)       | 0 (0.0)                  |
| Likely patient                                                 | 1 (7.7)                    | 1 (11.1)               | 0 (0.0)       | 0 (0.0)                  |
| Unclear                                                        | 4 (30.8)                   | 6 (66.7)               | 4 (100.0)     | 1 (6.7)                  |
| Non-occupational                                               | 0 (0.0)                    | 0 (0.0)                | 0 (0.0)       | 7 (46.7)                 |

80% of the infections origin from patients happened either in the normal or cohorted ward.

Additionally, 61 (7.4%) non-infected participants were quarantined by local infection doctors due to occupational COVID-19 exposure, 13 (1.6%) due to non-occupational exposure, and 1 (0.1%) due to both. Of the 62 occupational exposures, 37 (59.7%) were from colleagues, 13 (21.0%) from patients, and 12 (19.3%) were not stated.

During the first wave, 20 (48.8%) of the infected worked either in a normal ward or among a cohort. Only 4 (20.0%) of these infected employees working in either ward were able to maintain the instructed 1-meter safety distance, whereas 8 (38.1%) of other infected were able to do so. Similarly, only one out of seven participants (16.7%) who got infection from a colleague at the workplace was able to maintain the 1-meter distance at the time of infection.

Of 93 ICU workers, no clear ICU-related infections were found. Two ICU workers reported either positive COVID-19 RT-PCR or positive antibody testing, excluding false positives. One had a non-occupational infection source and another's remains unclear.

Further information about the workplace of participants during the first wave of the COVID-19 epidemic, ability to maintain 1-meter distance and ORs is seen in Table 3.

**Table 3.** Working place, ability to maintain 1 meter distance and OR for infection of participants during the first wave of the COVID-19 epidemic

| Department                                             | Was able to maintain 1-meter distance N (%)* | Infected N (%) | Any COVID-19 infection |         |          | Work-related COVID-19 infection |         |          | Combined OR (%95 CI), <i>P</i> |
|--------------------------------------------------------|----------------------------------------------|----------------|------------------------|---------|----------|---------------------------------|---------|----------|--------------------------------|
|                                                        |                                              |                | OR                     | %95 CI  | <i>P</i> | OR                              | %95 CI  | <i>P</i> |                                |
| Cohort COVID-19 ward (N=83)                            | 23 (28.0)                                    | 5 (6.0)        | 1.3                    | 0.5–3.5 | 0.583    | 2.9                             | 1.0–8.0 | 0.051    | 3.4 (1.2–9.2)<br>0.016         |
| Ward (N=170)                                           | 58 (34.1)                                    | 15 (8.8)       | 2.5                    | 1.3–4.8 | 0.008    | 2.0                             | 0.8–4.9 | 0.170    |                                |
| Emergency department (N=96)                            | 26 (27.1)                                    | 6 (6.3)        | 1.4                    | 0.6–3.4 | 0.443    | 2.4                             | 0.9–6.8 | 0.086    |                                |
| ICU (N=93)                                             | 29 (30.9)                                    | 2 (4.3)        | 0.4                    | 0.1–1.7 | 0.214    | n/a                             | n/a     | 0.099    |                                |
| Medical imaging (N=55)                                 | 23 (41.8)                                    | 0 (0.0)        | n/a                    | n/a     | 0.088    | n/a                             | n/a     | 0.216    | 0.3 (0.1–0.8)<br>0.016         |
| Outpatient appointment clinic (N=175)                  | 100 (57.1)                                   | 6 (3.4)        | 0.7                    | 0.3–1.6 | 0.431    | 0.2                             | 0.0–1.4 | 0.064    |                                |
| Researcher / administration / other non-patient (N=50) | 32 (64.0)                                    | 3 (6.0)        | 1.3                    | 0.4–4.4 | 0.664    | 1.7                             | 0.4–7.3 | 0.499    |                                |
| Sampling (N=97)                                        | 40 (41.2)                                    | 2 (2.1)        | 0.4                    | 0.1–1.7 | 0.188    | 0.8                             | 0.2–3.4 | 0.751    |                                |
| Surgery (N=47)                                         | 14 (29.8)                                    | 2 (4.3)        | 0.9                    | 0.2–3.8 | 0.874    | n/a                             | n/a     | 0.255    |                                |
| All (N=866)                                            | 345 (39.9)                                   | 41 (4.7)       | n/a                    | n/a     | n/a      | n/a                             | n/a     | n/a      | n/a                            |

\* One missing value.

### PPE usage of participants

Of the participants, 340 (39.5%, n=861) practised donning and doffing (D&D) PPE under supervision, and only 77 (8.9%) answered that they did not know how to do D&D correctly.

Among the participants with occupational infection, 10 (45.5%) informed that they practiced D&D under supervision, and all 22 (100%) answered that they knew how to do it correctly.

Only 13 participants (1.8%) told that they used a minimum of FFP2/3 respirators with non-infection patients (Figure 1), and that figure increased to 169 (28.5%) with suspected COVID-19 patients, but even with confirmed COVID-19 patients, fewer than half (210, 41.7%) used at least an FFP2/3 respirator.

#### Usage of respirators and masks, and ability to maintain social distance from COVID-19-positive participants at the time of infection

Out of 22 confirmed or likely occupational infections, only 7 (31.8%) informed that they were able to maintain a distance of at least 1 meter from other staff members. Regarding PPE shortages, 23 (2.8%, N=824) participants reported a complete shortage of PPE, but none of them were diagnosed with COVID-19. 224 (27.2%, N=824) other participants reported some cases of partial shortages with 7 (3.1%) confirmed or likely workplace related infections.

Detailed information on positive participants' COVID-19 infection location and mask and respirator usage is presented in Table 4.

**Table 4.** COVID-19 positive participants' mask and respirator usage, safety distance and source of infection by infection location groups

| Characteristics                                                                                   | The most probable location where infection occurred according to infection tracing |                        |               |                          |
|---------------------------------------------------------------------------------------------------|------------------------------------------------------------------------------------|------------------------|---------------|--------------------------|
|                                                                                                   | Workplace (N=13)                                                                   | Likely workplace (N=9) | Unclear (N=4) | Outside workplace (N=15) |
| <b>Used mask/respirator at the estimated infection time – no. (%)</b>                             |                                                                                    |                        |               |                          |
| FFP2/3 respirator                                                                                 | 0 (0.0)                                                                            | 0 (0.0)                | 1 (25.0)      | 0 (0.0)                  |
| Surgical mask                                                                                     | 9 (69.2)                                                                           | 5 (55.6)               | 1 (25.0)      | 0 (0.0)                  |
| None                                                                                              | 4 (30.8)                                                                           | 4 (44.4)               | 2 (50.0)      | 15 (100.0)               |
| <b>Was able to maintain the 1-meter safety distance at the estimated infection time – no. (%)</b> |                                                                                    |                        |               |                          |
|                                                                                                   | 2 (15.4)                                                                           | 5 (55.6)               | 1 (25.0)      | 4 (26.7)                 |

## DISCUSSION

### HCWs' COVID-19 infection rate vs the general population

Overall, 41 or 4.7% of participants had tested positive for COVID-19, which was more than the overall HUS HCWs (0.9%) and much higher than that of general population in HUS-area (0.3%). Healthcare worker's higher risk for COVID-19 infection was also been reported earlier, and our findings are in line with earlier studies<sup>8 13 21</sup>. The confirmed or likely occupational infections represented 53.7% of participants infection, somewhat higher than that of all HUS-area HCWs (44.0%)<sup>10</sup>. It is notable that the participants also had non-occupational contacts with other HCWs, and in our study, 5 (33%) of confirmed non-occupational infections were still from a colleague.

### FFP2/3 respirator vs Surgical mask in occupational infections

This is the first study that analyses the source of infection and compares the impact of using of either a surgical mask or an FFP2/3 respirators on HCWs' COVID-19 infections, which aligns with an earlier meta-analysis indicating that respirators might have a stronger protective effect than surgical masks toward SARS-CoV-2<sup>21</sup>.

In our study, none of the ICU HCWs got sick while using the recommended PPE (FFP3 respirator [FFP2, if FFP3 is not available], pair of gloves, long-sleeved fluid repellent gown, hair protection and eye protection), although they spend the whole shift in the same room with the COVID-19-patients. The OR for occupational-COVID-19 infection was 3.4 ( $p= 0.016$ ) when working in areas where COVID-19 positive patients are treated. All occupational infections that were traced from patients ( $N=4$ , 20.0%) in the wards happened after instructing HCWs to reduce PPE to surgical masks. In the ICU, the instructions about respirator, PPE and other infection prevention were equal to those recommended in the literature. Although the HUS practice of frequent doffing inside patient area in the wards might increase the risk of infection, the UK guideline is to use the same mask for a session of

work, and the infection rate for HCWs is even higher<sup>8 22</sup>. With other viral infections, contamination while D&D has been observed<sup>23</sup>, marking the importance of assisted D&D and training<sup>24</sup>. In our data, only under 40% of participants had trained D&D, and prevention of possible contamination during D&D needs more attention.

In an earlier study, surgical masks were shown to reduce SARS-CoV-2-virus transmission<sup>21</sup>, but in our study, especially in the wards with high exposure, the surgical mask is obviously less protective against COVID-19.

Out of the 413 participants who perform AGPs with infection patients, only 180 (43.6%) use FFP2/3 respirators. Furthermore, 42 (10.7%) participants said that they are not using FFP2/3 respirators even while performing AGPs with COVID-19-positive patients. The WHO and other international and THL recommendations suggest always using FFP2/3 respirators in AGPs<sup>13 19 25</sup>.

Surprisingly, out of 279 participants who performed COVID-19 PCR sampling, 148 (53.0%) used FFP2/3 masks, marking a higher figure than those who care for the confirmed COVID-19 patients. The extensive PCR sampling safety measures, such as drive-in sampling stations where the suspected COVID-19 infected stays in their car for the whole procedure, and the short exposure time of less than 15 minutes during the sampling are likely to explain the absence of COVID-19 patients with laboratory nurses.

### **Occupational infections between co-workers**

When tracing, 29.3% of infections were traced back to colleagues both at the workplace (N=7) and outside (N=5). The use of surgical masks in employees' facilities could reduce transmissions, but this needs to be studied further. The WHO recommends using medical masks continuously throughout a shift, apart from eating and drinking. The mask should be changed after caring for a patient requiring droplet/contact precautions for other reasons

(e.g., influenza) to avoid any possibility of cross-transmission.<sup>13</sup> At HUS, the guideline has been to use surgical masks only during patient contact, avoid any personal gatherings, and keep at least 1 meter social distance. A recent systematic review<sup>21</sup> shows a clear association in the reduction of infections by having at least 1 meter of physical distance, and this study also supports the importance of social distances also for HCWs. Despite the restrictions, 83.3% of those who got the infection from a colleague at the workplace and 60.1% of all participants were not able to maintain the instructed 1-meter radius from other people. Of all participants, 69 were guaranteed due to COVID-19 exposure from a colleague, and 46 of those (66.6%) were not able to maintain the instructed safety distance. This highlights the difficulty of following this instruction in a crowded hospital setting and urges hospitals to find additional ways of reducing transmission between colleagues.

### **Other findings**

Out of 21 pregnant participants, 10 treated COVID-19 patients, and 3 were uncertain whether they had or not. A recent study from Alzamora et al. showed the possible transmission of the virus from mother to foetus<sup>26</sup>; the consequences of first- or second-trimester infection are still unclear, and considering the hypercoagulopathy of COVID-19 and pregnancy, the risk of thromboembolic events is probably elevated<sup>27</sup>. Luckily, the low risk for perinatal transmission at the time of delivery by non-severe SARS-CoV-2-positive mothers has been reported<sup>28</sup>. More alarming, there have been findings of SARS-CoV-2 in amniotic fluid and placental tissue and maternal death with severe SARS-CoV-2-positive mothers<sup>29 30</sup>. Accordingly, it can be presumed that pregnant women should not engage in direct contact with COVID-19 patients<sup>27 31</sup>.

### **Strengths and weaknesses of this study:**

This is the first study to analyse the impact of using surgical masks vs FFP2/3 respirators in

HCWs during the COVID-19 pandemic. The masks and respirators were tested by the employer before usage, and the availability of masks was good during the whole study. The positive COVID-19 infections were proven by COVID-19 RT-PCR and antibody tests, which are the gold standard in COVID-19 diagnostics<sup>32</sup>. The study was conducted prospectively during the COVID-19 pandemic, and all of the nurses and doctors working at HUS were informed about the study. Of those that opted to participate, 95% stated that they have followed the state restrictions. These factors, combined with the low density of 176/km<sup>2</sup> in Uusimaa, greatly reduce the likelihood of non-occupational infections of HCWs and hence increase the reliability of analysis on workplace-related infections.

It could be argued that the high infection rate of HCWs is due to their more extensive testing. However, the guidelines in Finland have been to test everyone with matching symptoms through universal healthcare. Although the testing HCWs has been prioritised, the testing capacity has been sufficient during most of the first wave, leaving only a limited number of potential symptomatic COVID-19–infected non-HCWs without diagnosis; thus, testing cannot explain the major difference in infection rates.

The characteristics of the participants reflect the overall personnel, although females are slightly overrepresented in this study, and as usual, the people related to the topic participate more frequently, as evident by the number of COVID-19 infected participants. The high number of infected participants gives this study a higher reliability in analysis of infection sources and PPE usage of those infected.

The participants reported that the availability of PPE, masks and respirators has been good compared to the use recommendations, and this does not limit the reliability of our results unlike in many other countries<sup>33</sup>.



## CONCLUSIONS

HCWs have a higher risk of COVID-19 infection compared to the general population. Despite the high exposure to SARS-CoV-2, none of the ICU workers got clear occupational COVID-19 infection, whereas working in a cohorted COVID-19 ward or a normal ward with COVID-19 patients seems to have a high-risk association for occupational COVID-19 infection. The main difference is that the ICU workforce has used FFP2/3 respirators and aerosol precautions, whereas in other departments, the PPE quality has been significantly lower or completely absent. Notably, 29.3% of the infections were from colleagues, thus also requiring special attention for social distances and infection control measures between co-workers.

We recommend that PPE similar to what is used in the ICU be used in all COVID-19–related treatments. Per the Finnish Employee Protection Law, this should be done regardless of additional PPE expenses, especially as the global supply of respirators has increased substantially. The possible role of aerosols in the transmission of SARS-CoV-2 needs to be further studied.

**FUNDING:** This work was supported by the Helsinki University Hospital Research Fund.

**CONFLICT OF INTEREST DISCLOSURE:** None of the authors has any financial or other relationships that might lead to a conflict of interest.

**ACKNOWLEDGEMENTS:** We thank Catharina Pomoell for her great work as a research nurse and Johan Sanmark for his support. We also thank all participants involved in this study and their help to find ways to ensure safe working environment.

## REFERENCES

1. Li Q, Guan X, Wu P, et al. Early Transmission Dynamics in Wuhan, China, of Novel Coronavirus-Infected Pneumonia. *N Engl J Med* 2020;382(13):1199-207. doi: 10.1056/NEJMoa2001316 [published Online First: 2020/01/30]
2. Lewis D. Is the coronavirus airborne? Experts can't agree. *Nature* 2020;580(7802):175. doi: 10.1038/d41586-020-00974-w [published Online First: 2020/04/04]
3. Organization WH. WHO-2019-nCoV-Sci\_Brief-Transmission\_modes-2020. 2020
4. Zhang S, Diao M, Yu W, et al. Estimation of the reproductive number of novel coronavirus (COVID-19) and the probable outbreak size on the Diamond Princess cruise ship: A data-driven analysis. *Int J Infect Dis* 2020;93:201-04. doi: 10.1016/j.ijid.2020.02.033 [published Online First: 2020/02/26]
5. Liu Y, Gayle AA, Wilder-Smith A, et al. The reproductive number of COVID-19 is higher compared to SARS coronavirus. *J Travel Med* 2020;27(2) doi: 10.1093/jtm/taaa021 [published Online First: 2020/02/14]
6. Sanche S, Lin YT, Xu C, et al. High Contagiousness and Rapid Spread of Severe Acute Respiratory Syndrome Coronavirus 2. *Emerg Infect Dis* 2020;26(7):1470-77. doi: 10.3201/eid2607.200282 [published Online First: 2020/04/08]
7. France Sp. Santé publique France. COVID-19 : point épidémiologique du 4 juin 2020. , 2020.
8. Houlihan CF, Vora N, Byrne T, et al. Pandemic peak SARS-CoV-2 infection and seroconversion rates in London frontline health-care workers. *Lancet* 2020;396(10246):e6-e7. doi: 10.1016/S0140-6736(20)31484-7 [published Online First: 2020/07/13]
9. Welfare FloHa. Situation update on coronavirus 2020 [Available from: <https://thl.fi/en/web/infectious-diseases-and-vaccinations/what-s-new/coronavirus-covid-19-latest-updates/situation-update-on-coronavirus>].
10. Jeganova M. Infection rates 15.7, Department of Health Security, National Institute for Health and Welfare National Institute for Health and Welfare, 2020.
11. Government F. Use of powers under the Emergency Powers Act to end – state of emergency to be lifted on Tuesday 16 June, 2020.
12. Virolainen A. Infection rate HUS 15.7.2020: Helsinki University Hospital, 2020.
13. Organization WH. Advice on the use of mask in the context of COVID-19, 2020.
14. Smith JD, MacDougall CC, Johnstone J, et al. Effectiveness of N95 respirators versus surgical masks in protecting health care workers from acute respiratory infection: a systematic review and meta-analysis. *CMAJ* 2016;188(8):567-74. doi: 10.1503/cmaj.150835 [published Online First: 2016/03/10]
15. Offeddu V, Yung CF, Low MSF, et al. Effectiveness of Masks and Respirators Against Respiratory Infections in Healthcare Workers: A Systematic Review and Meta-Analysis. *Clin Infect Dis* 2017;65(11):1934-42. doi: 10.1093/cid/cix681 [published Online First: 2017/11/16]
16. Mannonen LK-K, H.; Loginov, R.; Jääskeläinen, A.; Jokela, P.; Antikainen, J.; Väre, P.; Kekäläinen, E.; Kurkela, S.; Jarva, H.; Lappalainen, M. . Comparison of two commercial platforms and a laboratory developed test for detection of SARS-CoV-2 RNA. *preprinted Medrxiv* 2020 doi: <https://doi.org/10.1101/2020.07.03.20144758>
17. Jokela PJ, A.; Jarva, H.; Holma, T.; Ahava, M.; Mannonen, L.; Lappalainen, M.; Kurkela, S.; Loginov, R. SARS-CoV-2 sample-to-answer nucleic acid testing in a tertiary care 2

- emergency department- evaluation and utility. *preprinted Medrxiv* 2020 doi: 10.1101/2020.07.03.20145383.this
18. Jaaskelainen AJ, Kuivanen S, Kekalainen E, et al. Performance of six SARS-CoV-2 immunoassays in comparison with microneutralisation. *J Clin Virol* 2020;129:104512. doi: 10.1016/j.jcv.2020.104512 [published Online First: 2020/06/21]
  19. Welfare FIFHa. List of Aerosol Generating Procedures: Finnish Institute for Health and Welfare; 2020 [Available from: <https://thl.fi/fi/web/infektiotaudit-ja-rokotukset/taudit-ja-torjunta/taudit-ja-taudinaiheuttajat-a-o/koronavirus-covid-19/toimenpideohje-epailtaessa-koronaviruksen-covid-19-aiheuttamaa-infektioita>.
  20. Hospital HU. Staff Report 2019: HUS; 2019 [Available from: <https://www.hus.fi/hus-tietoa/materiaalipankki/henkilostokertomukset/Documents/Henkil%c3%b6st%c3%b6kertomus%202019.pdf> accessed 15.8.2020.
  21. Chu DK, Akl EA, Duda S, et al. Physical distancing, face masks, and eye protection to prevent person-to-person transmission of SARS-CoV-2 and COVID-19: a systematic review and meta-analysis. *The Lancet* 2020;395(10242):1973-87. doi: 10.1016/S0140-6736(20)31142-9
  22. England PH. Guidance: COVID-19 personal protective equipment (PPE). Updated 7 August 2020 ed, 2020.
  23. Suen LKP, Guo YP, Tong DWK, et al. Self-contamination during doffing of personal protective equipment by healthcare workers to prevent Ebola transmission. *Antimicrob Resist Infect Control* 2018;7:157. doi: 10.1186/s13756-018-0433-y [published Online First: 2019/01/05]
  24. Diaz-Guio DA, Ricardo-Zapata A, Ospina-Velez J, et al. Cognitive load and performance of health care professionals in donning and doffing PPE before and after a simulation-based educational intervention and its implications during the COVID-19 pandemic for biosafety. *Infez Med* 2020;28(suppl 1):111-17. [published Online First: 2020/06/14]
  25. Cook TM. Personal protective equipment and concerns over airborne transmission of COVID-19: a reply. *Anaesthesia* 2020;75(8):1117-18. doi: 10.1111/anae.15143 [published Online First: 2020/06/12]
  26. Alzamora MC, Paredes T, Caceres D, et al. Severe COVID-19 during Pregnancy and Possible Vertical Transmission. *Am J Perinatol* 2020;37(8):861-65. doi: 10.1055/s-0040-1710050 [published Online First: 2020/04/19]
  27. McDonald ES. COVID-19 and essential pregnant worker policies. *The Lancet Infectious Diseases* doi: 10.1016/S1473-3099(20)30446-1
  28. Salvatore CM, Han J-Y, Acker KP, et al. Neonatal management and outcomes during the COVID-19 pandemic: an observation cohort study. *The Lancet Child & Adolescent Health* doi: 10.1016/S2352-4642(20)30235-2
  29. Zamaniyan M, Ebadi A, Aghajanpoor S, et al. Preterm delivery, maternal death, and vertical transmission in a pregnant woman with COVID-19 infection. *Prenat Diagn* 2020 doi: 10.1002/pd.5713 [published Online First: 2020/04/19]
  30. Kirtsman M, Diambomba Y, Poutanen SM, et al. Probable congenital SARS-CoV-2 infection in a neonate born to a woman with active SARS-CoV-2 infection. *CMAJ* 2020;192(24):E647-E50. doi: 10.1503/cmaj.200821 [published Online First: 2020/05/16]
  31. Kowalski LP, Sanabria A, Ridge JA, et al. COVID-19 pandemic: Effects and evidence-based recommendations for otolaryngology and head and neck surgery practice. *Head*

*Neck* 2020;42(6):1259-67. doi: 10.1002/hed.26164 [published Online First: 2020/04/10]

32. Tang YW, Schmitz JE, Persing DH, et al. Laboratory Diagnosis of COVID-19: Current Issues and Challenges. *J Clin Microbiol* 2020;58(6) doi: 10.1128/JCM.00512-20 [published Online First: 2020/04/05]
33. Delgado D, Wyss Quintana F, Perez G, et al. Personal Safety during the COVID-19 Pandemic: Realities and Perspectives of Healthcare Workers in Latin America. *Int J Environ Res Public Health* 2020;17(8) doi: 10.3390/ijerph17082798 [published Online First: 2020/04/25]

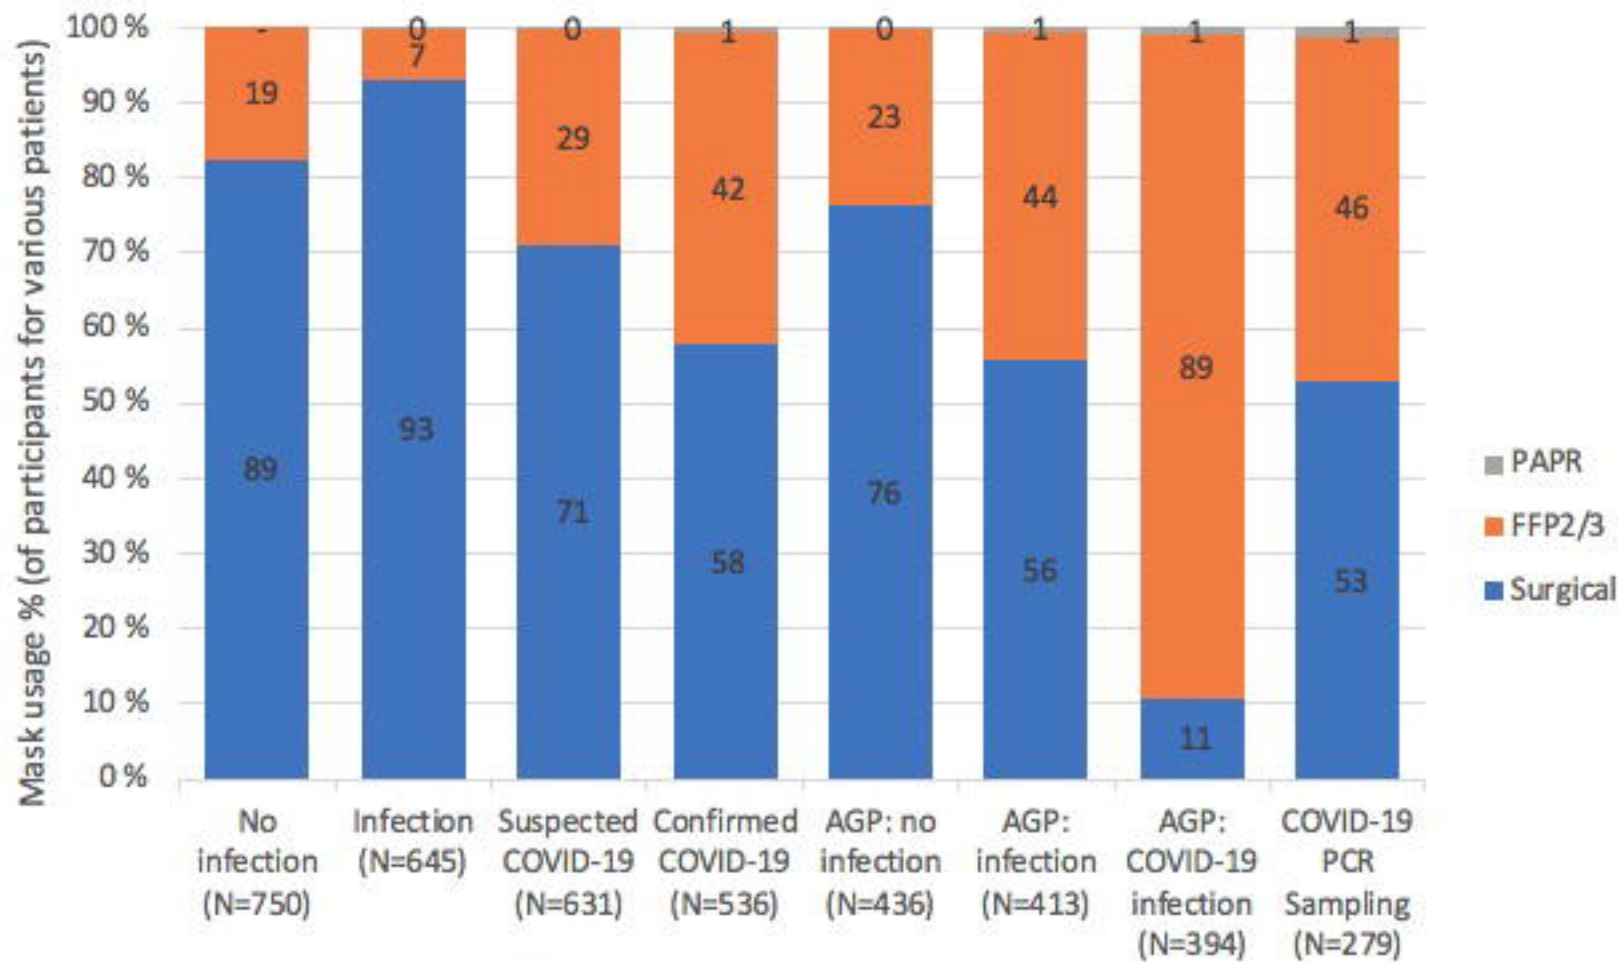

Source: https://www.medrxiv.org/content/medrxiv/early/2020/08/18/2020.08.17.20176842.full.pdf
